# Supplementary material for: Interplay between the σ-tetrel bond and σ-halogen bond in PhSiF3⋯4-iodopyridine⋯N-base
Source: Royal Society of Chemistry journal article supplement (doi:10.1039/c7ra02068f), 2017-01-01
Supplement: c7ra02068f1.pdf [file c7ra02068f1.pdf]

## Supporting information

Table S1 The change ( $\Delta\theta$ , deg) of angle C–T–Y (T = C, Si and Ge; Y = H, F and Cl) in the dyads relative to that in the monomers

| dyads                      | $\Delta\theta$ |
|----------------------------|----------------|
| PhCF <sub>3</sub> ...PyI   | -0.58          |
| PhSiF <sub>3</sub> ...PyI  | -12.66         |
| PhGeF <sub>3</sub> ...PyI  | -13.73         |
| PhSiH <sub>3</sub> ...PyI  | -4.50          |
| PhSiCl <sub>3</sub> ...PyI | -11.78         |
| PhSiF <sub>3</sub> ...PyBr | -12.65         |

Table S2 The increased/decreased percentage of binding energies of both interactions in the triads

| triads                                                      | $\Delta\Delta E_{TB}\%$ | $\Delta\Delta E_{XB}\%$ |
|-------------------------------------------------------------|-------------------------|-------------------------|
| PhCF <sub>3</sub> ...PyI...NH <sub>3</sub>                  | -41.3%                  | -6.1%                   |
| PhSiF <sub>3</sub> ...PyI...NH <sub>3</sub>                 | 14.7%                   | 30.8%                   |
| PhGeF <sub>3</sub> ...PyI...NH <sub>3</sub>                 | 9.5%                    | 34.3%                   |
| PhSiH <sub>3</sub> ...PyI...NH <sub>3</sub>                 | 20.3%                   | 11.7%                   |
| PhSiCl <sub>3</sub> ...PyI...NH <sub>3</sub>                | 15.5%                   | 35.1%                   |
| PhSiF <sub>3</sub> ...PyI...NCH                             | 12.9%                   | 37.0%                   |
| PhSiF <sub>3</sub> ...PyI...NHCH <sub>2</sub>               | 14.7%                   | 28.3%                   |
| PhSiF <sub>3</sub> ...PyI...NH <sub>2</sub> CH <sub>3</sub> | 16.1%                   | 26.6%                   |
| PhSiF <sub>3</sub> ...PyBr...NH <sub>3</sub>                | 12.3%                   | 43.1%                   |

Table S3. Change of electron density ( $\Delta\rho$ , au) in the triads relative to the dyads.

| triads                                                      | $\Delta\rho_{\text{TB/HB}}$ | $\Delta\rho_{\text{XB}}$ |
|-------------------------------------------------------------|-----------------------------|--------------------------|
| PhCF <sub>3</sub> ...PyI...NH <sub>3</sub>                  | -0.0001                     | -0.0001                  |
| PhSiF <sub>3</sub> ...PyI...NH <sub>3</sub>                 | 0.0041                      | 0.0021                   |
| PhGeF <sub>3</sub> ...PyI...NH <sub>3</sub>                 | 0.0032                      | 0.0023                   |
| PhSiH <sub>3</sub> ...PyI...NH <sub>3</sub>                 | 0.0030                      | 0.0010                   |
| PhSiCl <sub>3</sub> ...PyI...NH <sub>3</sub>                | 0.0047                      | 0.0023                   |
| PhSiF <sub>3</sub> ...PyI...HCN                             | 0.0036                      | 0.0014                   |
| PhSiF <sub>3</sub> ...PyI...NHCH <sub>2</sub>               | 0.0041                      | 0.0023                   |
| PhSiF <sub>3</sub> ...PyI...NH <sub>2</sub> CH <sub>3</sub> | 0.0044                      | 0.0025                   |
| PhSiF <sub>3</sub> ...PyBr...NH <sub>3</sub>                | 0.0035                      | 0.0011                   |

Table S4. Change of second-order perturbation energies ( $\Delta E^{(2)}$ , kJ/mol) in the triads relative to the dyads.

| triads                                                      | $\Delta E_1^{(2)}$ | $\Delta E_2^{(2)}$ | $\Delta E_3^{(2)}$ |
|-------------------------------------------------------------|--------------------|--------------------|--------------------|
| PhCF <sub>3</sub> ...PyI...NH <sub>3</sub>                  | 0.00               | ---                | -0.14              |
| PhSiF <sub>3</sub> ...PyI...NH <sub>3</sub>                 | 17.90              | 0.52               | 6.94               |
| PhGeF <sub>3</sub> ...PyI...NH <sub>3</sub>                 | 40.13              | 0.17               | 7.82               |
| PhSiH <sub>3</sub> ...PyI...NH <sub>3</sub>                 | 12.75              | 7.44               | 3.26               |
| PhSiCl <sub>3</sub> ...PyI...NH <sub>3</sub>                | 26.88              | 3.01               | 8.03               |
| PhSiF <sub>3</sub> ...PyI...HCN                             | 51.12              | 1.08               | 3.39               |
| PhSiF <sub>3</sub> ...PyI...NHCH <sub>2</sub>               | 19.95              | 1.21               | 7.74               |
| PhSiF <sub>3</sub> ...PyI...NH <sub>2</sub> CH <sub>3</sub> | 62.62              | 1.29               | 9.03               |
| PhSiF <sub>3</sub> ...PyBr...NH <sub>3</sub>                | 51.37              | 1.01               | 2.67               |

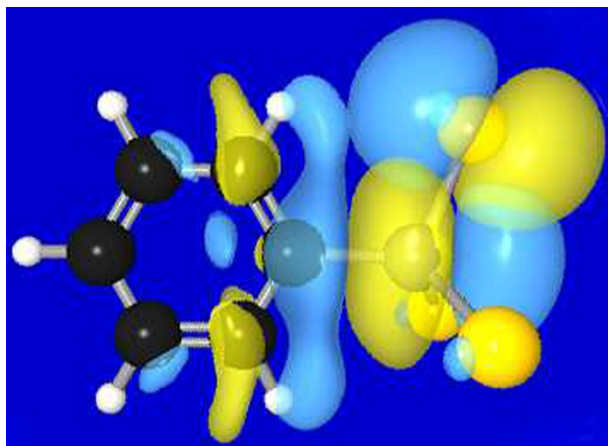

Figure S1 Diagram of  $\text{Lp}(\text{Cl}) \rightarrow \sigma^*(\text{C-Si})$  orbital interaction in  $\text{PhSiCl}_3$
